# Supplementary material for: Loss of TDP-43 induces synaptic dysfunction that is rescued by UNC13A splice-switching ASOs
Source: PubMed Central journal article supplement — bioRxiv. 2024 Jun 24:2024.06.20.599684. Preprint. [Version 1] doi: 10.1101/2024.06.20.599684 (PMC11230273; doi:10.1101/2024.06.20.599684), 2024-06-24
Supplement: media-1.pdf [file media-1.pdf]

## Extended Data Figures and Table

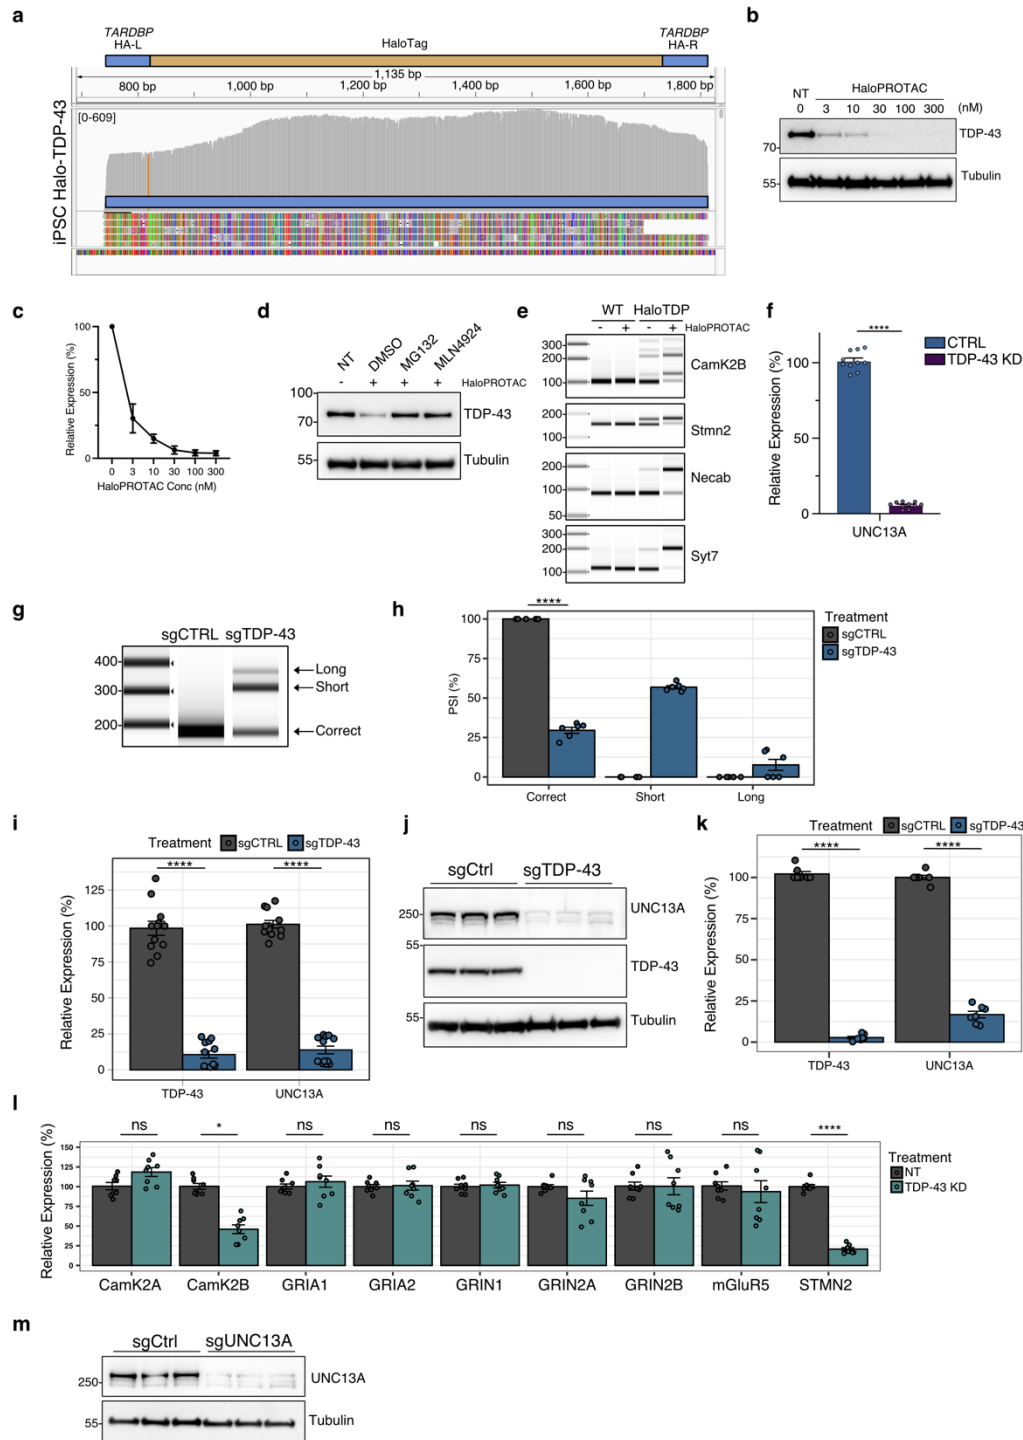

**Extended Data Figure 1 | CRISPRi mediated knockdown of TDP-43 in iNeurons.** **a**, Amplicon sequencing of PCR products from Fig. 1A indicates correct HaloTag editing of *TARDBP*. **b**, HaloTDP iNeurons were treated with the indicated concentration of HaloProtac for 4 days and processed for western blot analysis indicating a dose response curve of HaloProtac on TDP-43 knockdown. **c**, Quantification of western blots in **(b)**  $n=3$  biological replicates. **d**, HaloTDP iNeurons were treated with 30 nM HaloProtac for 3 hours in the presence of DMSO, proteasome inhibitor MG132, or NEDD8 E1 inhibitor MLN4924. **e**, RT-PCR analysis of WT and Halo-iNeurons shows the Halo tag induces a mild loss of TDP-43 function and can induce cryptic exon inclusion in the indicated transcripts. **f**, RT-qPCR analysis of correctly spliced *UNC13A* at exon 20-21 junction. **g-k**, Analysis of control and CRISPRi-mediated TDP-43 knockdown in DIV 28 iNeurons. **(g)** RT-PCR analysis of *UNC13A* splicing at exon junction 20-21 shows the inclusion of a long and short cryptic exon after TDP-43

KD. **(h)** Quantification of results in **(g)**  $n=6$  from 3 experiments. **(i)** RT-qPCR analysis shows a reduction of correctly spliced *UNC13A* at exon 20-21 junction following TDP-43 KD. **(j)** Western blot analysis indicates a dramatic decrease in *UNC13A* protein after TDP-43 KD. **(k)** Quantification of results in **(j)**  $n=7$  from 3 experiments. **l**, RT-qPCR analysis of DIV 28 HaloTDP iNeuron cultures indicates similar expression of glutamate receptors. A cryptic exon in *CamK2B* and cryptic polyadenylation in *STMN2* results in reduction of mRNA transcripts.  $n=8$  from 2 experiments. **m**, Western blot analysis of control and CRISPRi-mediated *UNC13A* knockdown in iNeurons. Graphs in **(f)** **(h)** **(i)** **(k)** and **(l)** represent mean  $\pm$  s.e.m. Statistics are two-sided Student's *t* test with additional Bonferroni adjustment for multiple comparisons in **(l)** \* $P < 0.05$ ; \*\* $P < 0.01$ ; \*\*\* $P < 0.001$ ; \*\*\*\* $P < 0.0001$ ; ns (not significant).

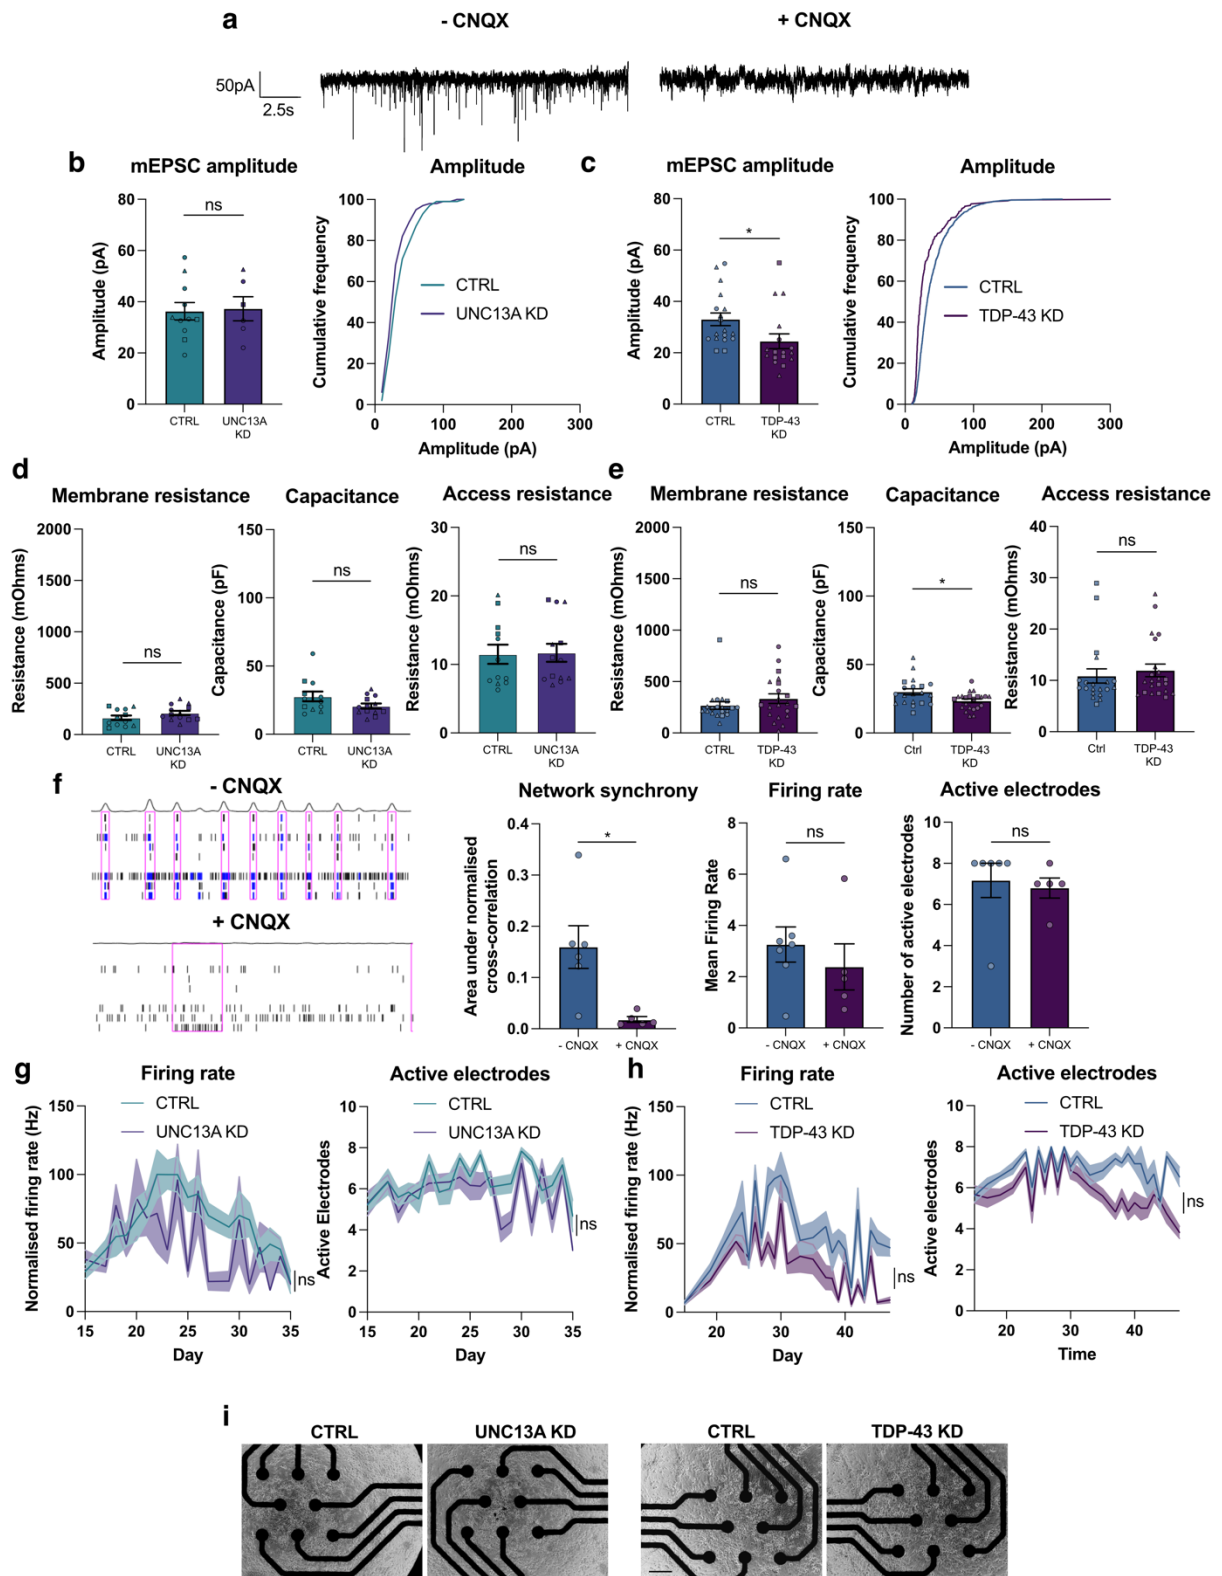

**Extended Data Figure 2 | Additional electrophysiological parameters following UNC13A and TDP-43 knockdown.** **a**, AMPAR blockade using CNQX abolishes mEPSC activity. **b**, mEPSC amplitude from control ( $n=12$ ) and UNC13A depleted ( $n=13$ ) iNeurons pooled from 3 experiments. **c**, mEPSC amplitude from control ( $n=20$ ) and TDP-43 knockdown ( $n=22$ ) HaloTDP iNeurons from 3 experiments. **d**, Quantification of passive membrane properties for UNC13A knockdown iNeurons. **e**, Quantification of passive membrane properties for TDP-43 knockdown iNeurons. **f**, AMPAR blockade using CNQX abolishes

network synchrony on multielectrode array recordings, with minimal effects on firing rate and number of active electrodes. **g**, Quantification of firing rate and number of active electrodes following UNC13A knockdown. **h**, Quantification of firing rate and number of active electrodes following TDP-43 knockdown. **i**, Phase contrast images showing cell coverage on multielectrode array plates. Scale bar = 350  $\mu\text{m}$ . Graphs for (**b**) (**c**) (**d**) (**e**) (**f**) represent mean  $\pm$  s.e.m. Statistics for (**b**) (**c**) (**d**) and (**f**) are two-sided Student's  $t$  tests. Statistics for (**g**) and (**h**) are paired  $t$  tests. \* $P < 0.05$ ; ns (not significant).

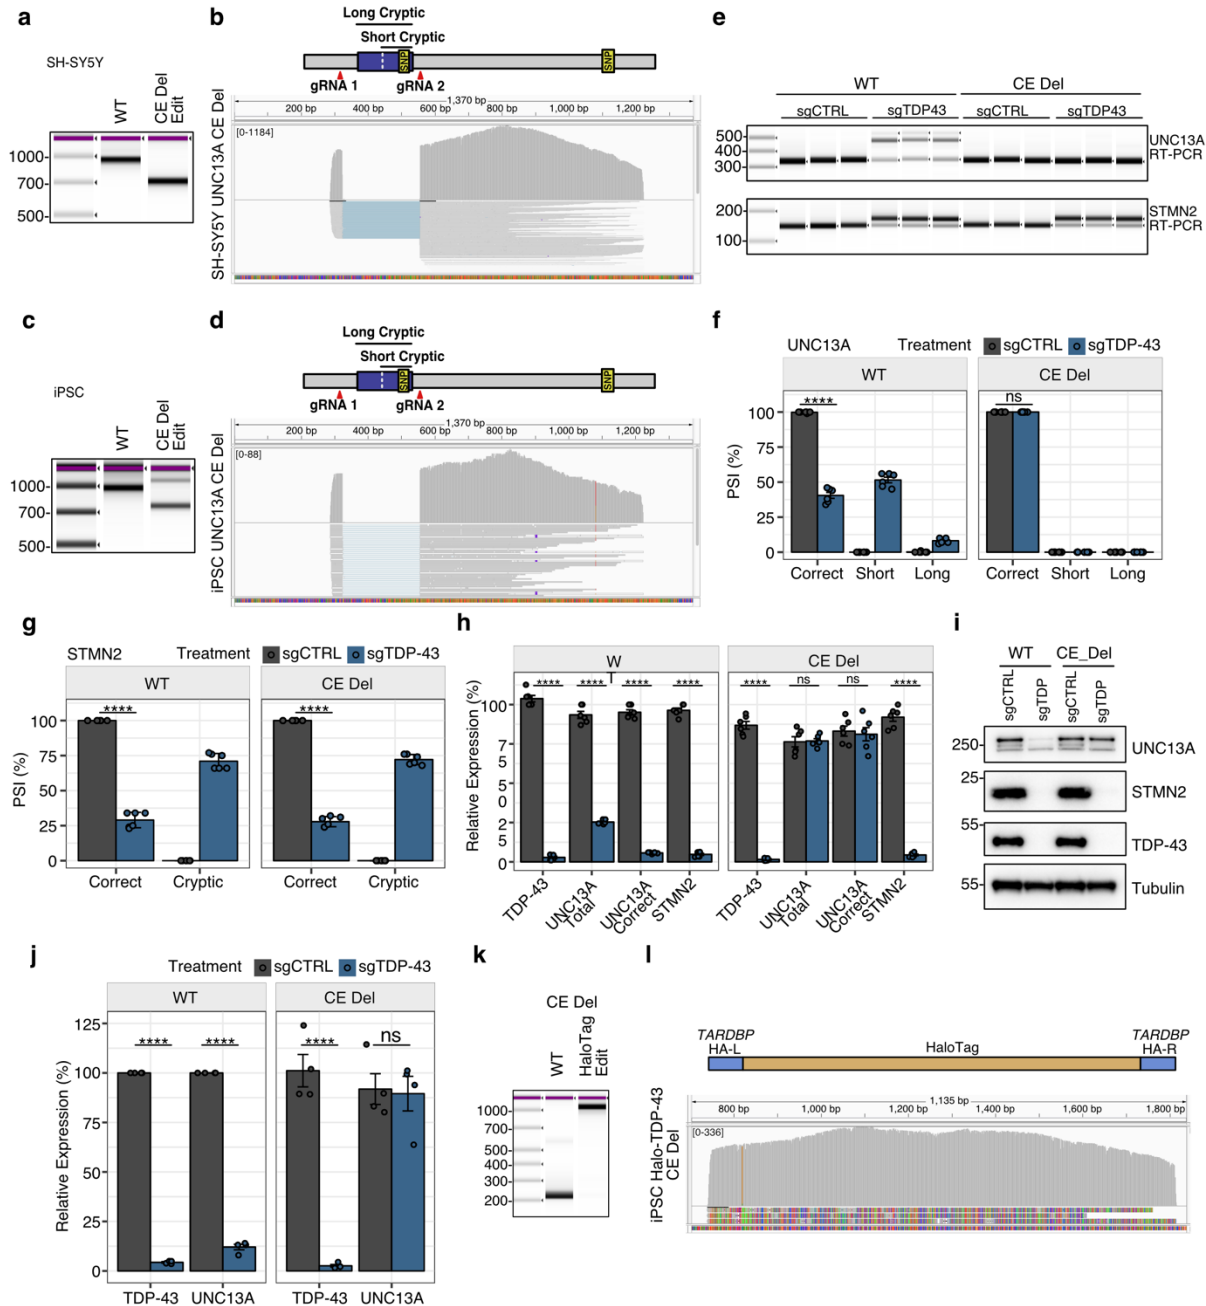

**Extended Data Figure 3 | *UNC13A* cryptic exon deletion rescues *UNC13A* splicing/expression following TDP-43 knockdown.** a, PCR from genomic DNA of WT SH-SY5Y cells and CE Del SH-SY5Y cells indicated successful deletion of the genomic region of *UNC13A* containing the sequence corresponding to the exon 20-21 cryptic exon. b, Amplicon sequencing of PCR products in (a). c, PCR from genomic DNA of WT iPSCs and CE Del iPSCs indicated successful deletion of the genomic region of *UNC13A* containing the sequence corresponding to the exon 20-21 cryptic exon. d, Amplicon sequencing of PCR products in (c) e-j, Analysis of WT and CE Del iNeurons following CRISPRi knockdown with CTRL or TDP-43 sgRNAs. (e) RT-PCR analysis shows *UNC13A* cryptic deletion rescues *UNC13A* exon 20-21 splicing following TDP-43 knockdown, but not cryptic polyadenylation of *STMN2* (f). Quantification of *UNC13A* splicing in figure (e)  $n=6$  biological replicates from 2 experiments. (g) Quantification of *STMN2* splicing in figure (e)

$n=6$  biological replicates from 2 experiments. (h) RT-qPCR analysis shows *UNC13A* CE Del prevents the loss of *UNC13A* transcripts but not *STMN2* transcripts in iNeurons after TDP-43 knockdown. *UNC13A* correct RT-qPCR assay detects correct splicing at *UNC13A* exon 20-21 junction.  $n = 6$  biological replicates from 2 experiments. (i) Western blot analysis shows *UNC13A* CE Del rescues the loss of UNC13A protein following TDP-43 knockdown. (j) Quantification of western blots in (i)  $n=4$  biological replicates from 2 experiments. k, PCR of genomic DNA of *UNC13A* CE Del iPSCs with primers flanking exon 1 of *TARDBP* indicates successful edit of *TARDBP* with HaloTag. l, Amplicon sequencing of HaloTag PCR product in (k). Graphs for (f) (g) (h) and (j) represent mean  $\pm$  s.e.m. Statistics are One-way ANOVA with Tukey multiple comparison test. \* $P < 0.05$ ; \*\* $P < 0.01$ ; \*\*\* $P < 0.001$ ; \*\*\*\* $P < 0.0001$ ; ns (not significant).

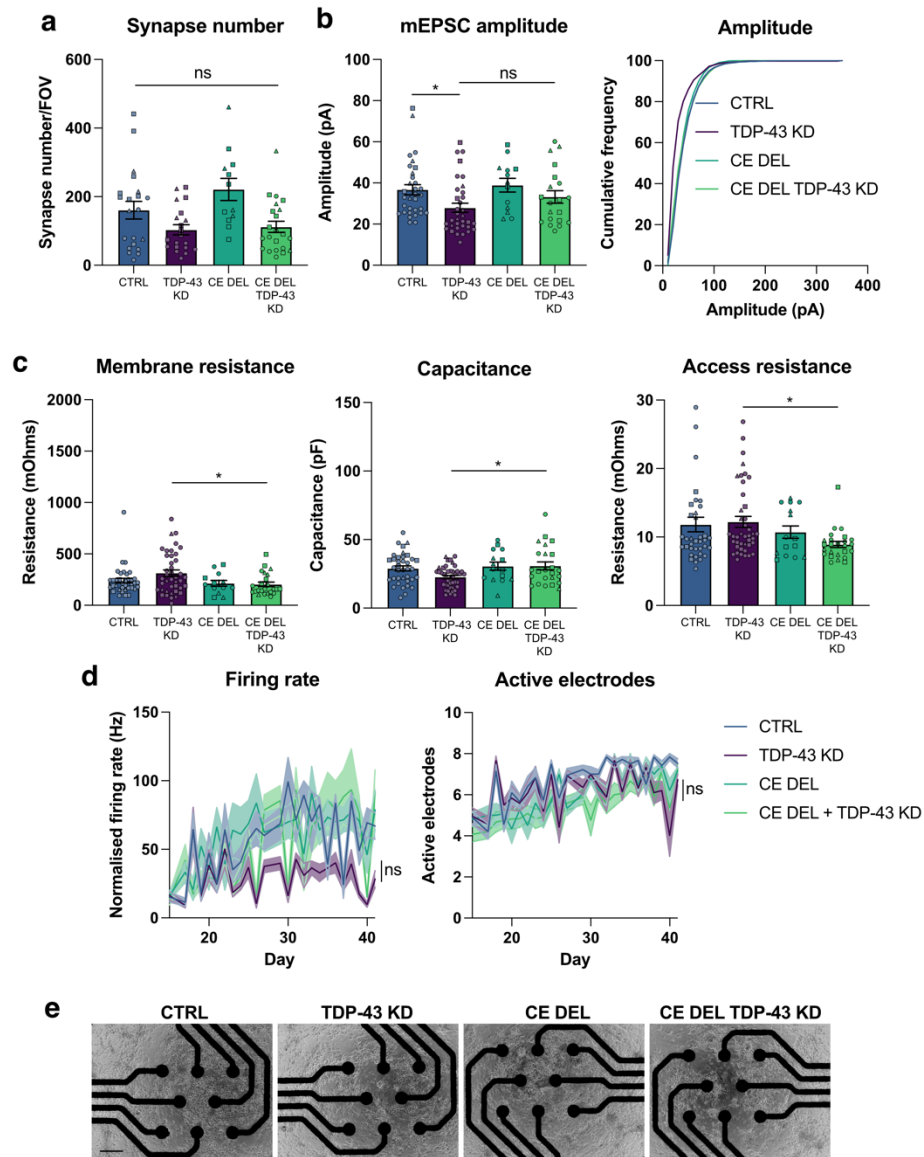

**Extended Data Figure 4 | Additional synaptic and electrophysiological parameters following genomic deletion of *UNC13A* CE.** **a**, Immunofluorescence quantification of synapse number and size based on synapsin labelling in control  $n=21$ , TDP-43 KD  $n=20$ , CE Del  $n=12$  and CE Del TDP-43 KD  $n=22$  fields of view from 3 experiments. **b**, mEPSC amplitude from control  $n=17$ , TDP-43 knockdown  $n=22$ , CE Del  $n=15$ , CE Del TDP-43 knockdown  $n=28$  iNeurons pooled from 3 experiments. **c**, Quantification of passive membrane properties. **d**, Quantification of

multielectrode array mean firing rates and number of active electrodes for control, TDP-43 KD, CE Del, CE Del TDP-43 KD conditions  $n=18$  wells from 3 experiments. **e**, Phase contrast images showing cell coverage on multielectrode array plates. Scale bar = 350  $\mu\text{m}$ . Graphs for **(a)** **(b)** **(c)** **(d)** represent mean  $\pm$  s.e.m. Statistics are One-way ANOVA with Dunnet's multiple comparison test.  $*P < 0.05$ ; ns (not significant).

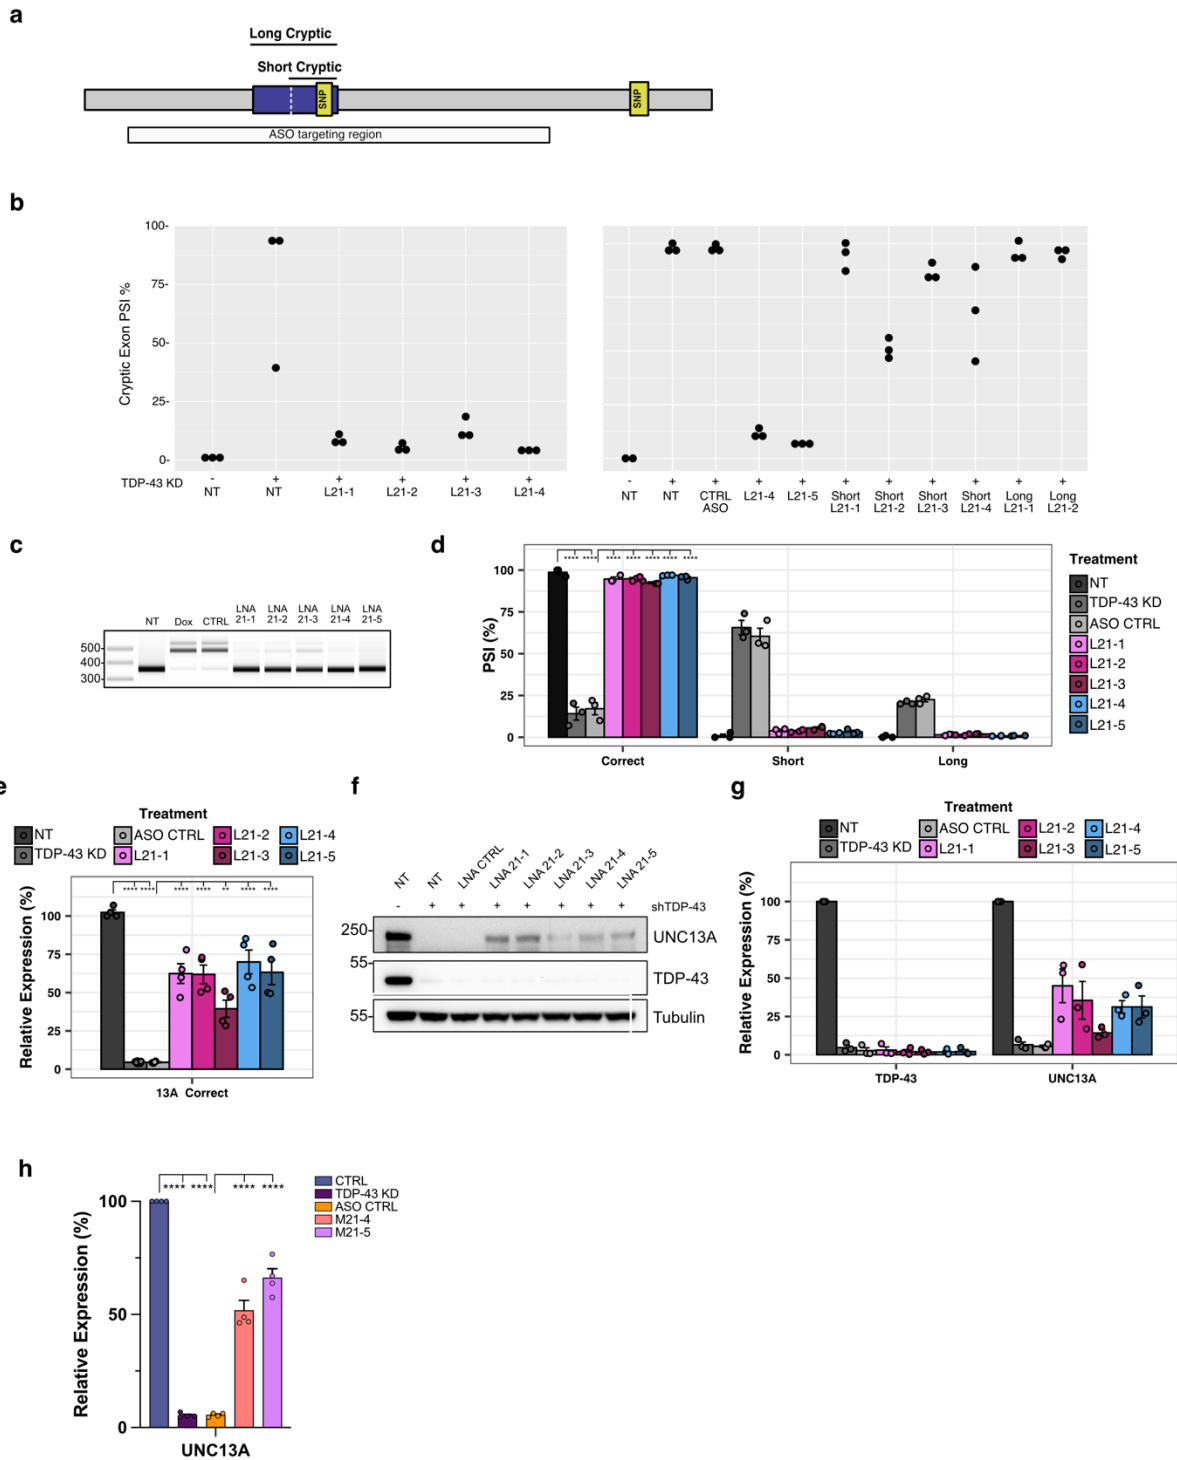

**Extended Data Figure 5 | ASOs targeting the *UNC13A* cryptic exon rescues *UNC13A* splicing/expression following TDP-43 knockdown.** **a**, Schematic of *UNC13A* cryptic exon. **b**, Quantification of RT-PCR products following treatment of SK-N-BE(2) cells with indicated ASOs. **c**, RT-PCR analysis of *UNC13A* splicing in SH-SY5Y cells shows ASOs prevent cryptic splicing after TDP-43 knockdown. **d**, Quantification of results in (C)  $n=3$  biological replicates from 2 experiments. **e**, RT-qPCR analysis of *UNC13A* shows an ASO mediated rescue of *UNC13A* RNA after TDP-43 KD in SH-SY5Y cells.  $n=4$  biological replicates from 2 experiments. **f**, Western blot analysis shows

rescue of *UNC13A* protein following ASO treatment after TDP-43 KD in SH-SY5Y cells. **g**, Quantification of blots from (f).  $n=3$  biological replicates from 3 experiments. **h**, RT-qPCR analysis of *UNC13A* shows an ASO mediated rescue of *UNC13A* RNA after TDP-43 KD in HaloTDP iNeurons.  $n=4$  biological replicates from 2 experiments. Graphs for (d) (e) (g) and (h) represent mean  $\pm$  s.e.m. Statistics are One-way ANOVA with Tukey multiple comparison test. \* $P < 0.05$ ; \*\* $P < 0.01$ ; \*\*\* $P < 0.001$ ; \*\*\*\* $P < 0.0001$ ; ns (not significant).

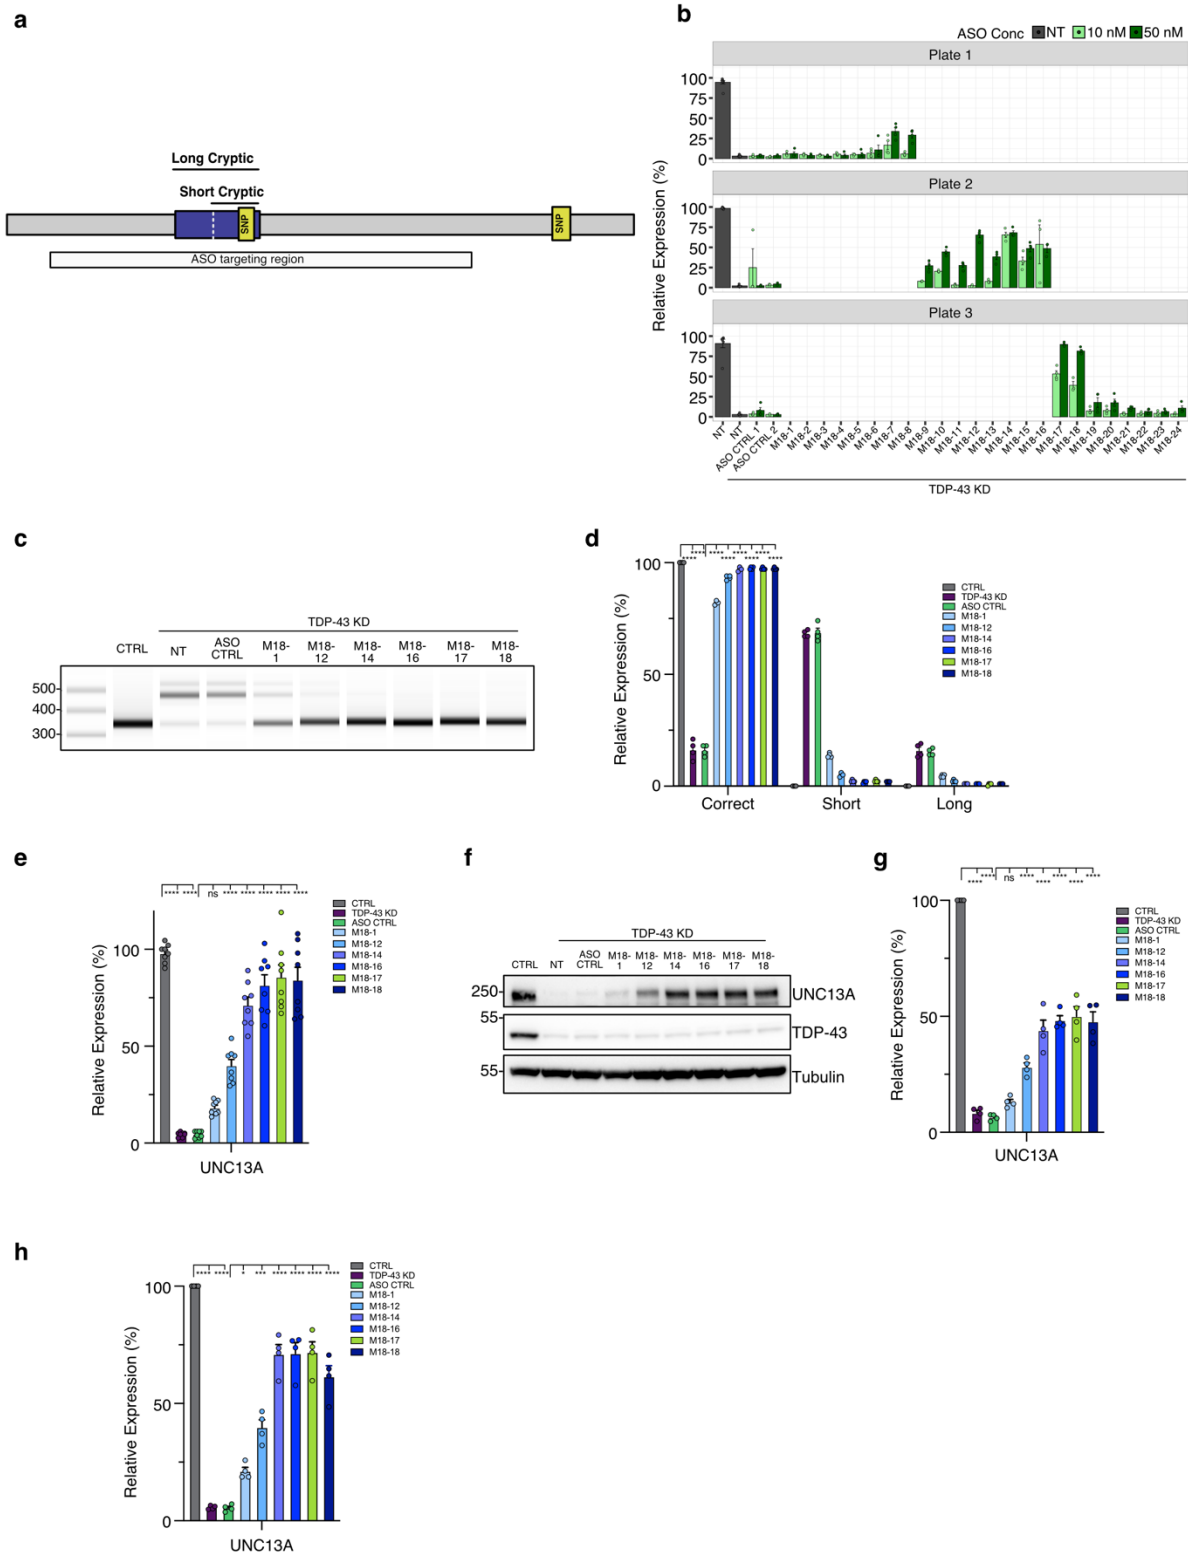

**Extended Data Figure 6 | Improved ASOs targeting the *UNC13A* cryptic exon rescues *UNC13A* splicing/expression following TDP-43 knockdown.** **a**, Schematic of *UNC13A* cryptic exon. **b**, Quantification of RT-PCR products following treatment of SH-SY5Y cells with indicated ASOs. **c**, RT-PCR analysis of *UNC13A* splicing in SH-SY5Y cells shows ASOs prevent cryptic splicing after TDP-43 knockdown. **d**, Quantification of results in (c)  $n=3$  biological replicates from 2 experiments. **e**, RT-qPCR analysis of *UNC13A* shows an ASO mediated rescue of *UNC13A* RNA after TDP-43 KD in SH-SY5Y cells.  $n=4$  biological replicates from 2 experiments. **f**, Western blot analysis shows rescue of UNC13A protein

following ASO treatment after TDP-43 KD in SH-SY5Y cells. **g**, Quantification of blots from (f).  $n=3$  biological replicates from 3 experiments. **h**, RT-qPCR analysis of *UNC13A* shows an ASO mediated rescue of *UNC13A* RNA after TDP-43 KD in Halo-iNeurons.  $n=4$  biological replicates from 2 experiments. Graphs for (d) (e) (g) and (h) represent mean  $\pm$  s.e.m. Statistics are One-way ANOVA with Tukey multiple comparison test. \* $P < 0.05$ ; \*\* $P < 0.01$ ; \*\*\* $P < 0.001$ ; \*\*\*\* $P < 0.0001$ ; ns (not significant).

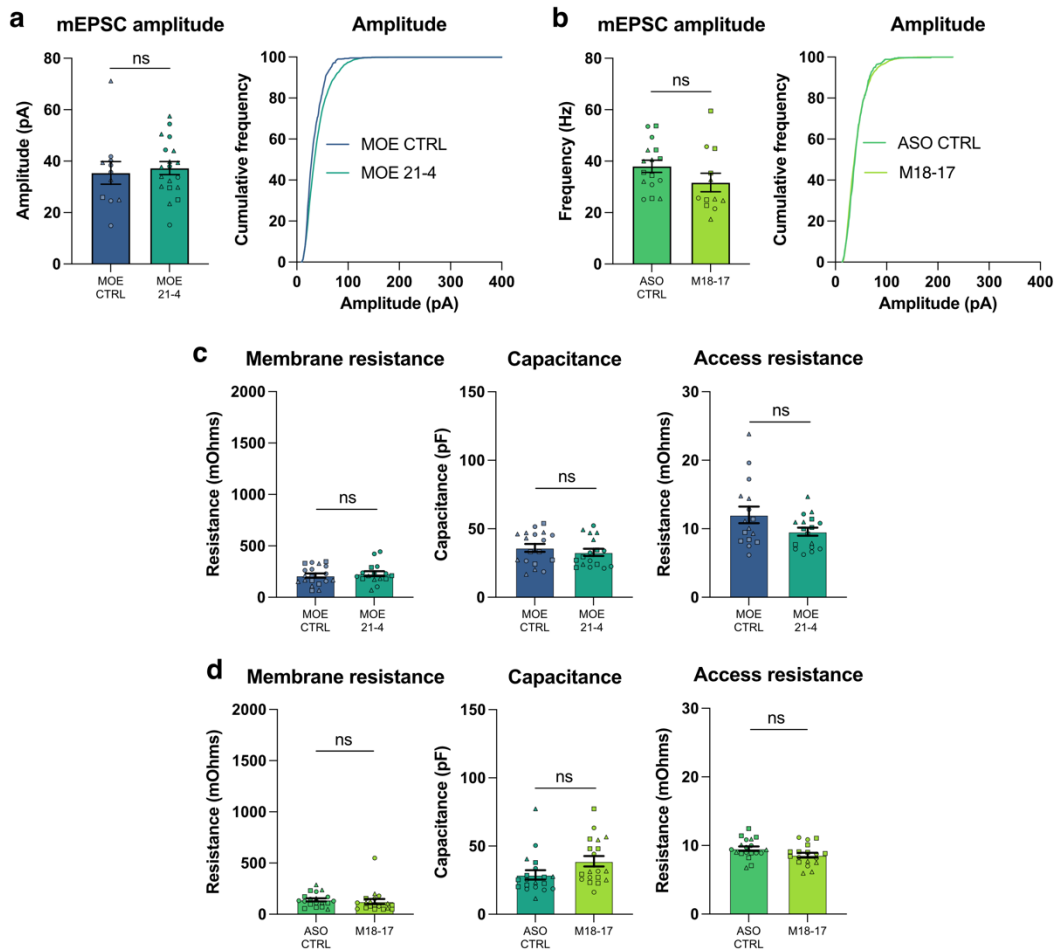

**Extended Data Figure 7 | Additional electrophysiological parameters following ASO treatments.** **a**, Quantification of mEPSC amplitude in TDP-43 KD iNeurons treated with MOE CTRL ASO ( $n=17$ ) and MOE 21-4 ASO ( $n=18$ ) from 3 experiments. **b**, Quantification of mEPSC amplitude in TDP-43 KD iNeurons treated with CTRL ASO ( $n=19$ ) and M18-17 ASO ( $n=19$ ) from 3 experiments. **c**, Passive membrane properties for TDP-43 KD iNeurons treated with MOE CTRL ASO ( $n=17$ ) and MOE 21-4 ASO ( $n=18$ ) from 3 experiments. **d**, Passive membrane properties in TDP-43 KD iNeurons treated with CTRL ASO ( $n=19$ ) and M18-17 ASO ( $n=19$ ) from 3 experiments. Graphs for **(a)** **(b)** **(c)** and **(d)** represent mean  $\pm$  s.e.m. Statistics are two-sided Student's  $t$  test. ns (not significant).

**Extended Data Table 1 | Key Reagents**

| <b>Reagent</b>                                 | <b>Supplier</b>           | <b>Catalog #</b>                |
|------------------------------------------------|---------------------------|---------------------------------|
| XAV939                                         | Cambridge Bioscience      | SM38-10                         |
| LDN-193189 hydrochloride                       | Cambridge Bioscience      | 19396-5mg-CAY                   |
| SB431542                                       | Cambridge Bioscience      | SM33-50                         |
| Recombinant Cas9                               | IDT                       | Alt-R® S.p. Cas9 Nuclease V3    |
| Recombinant Cas12                              | IDT                       | Alt-R® A.s. Cas12a (Cpf1) Ultra |
| HDR Enhancer V2                                | IDT                       | NA                              |
| Trans-IT 293                                   | Mirus                     | MIR2700                         |
| dibutyl cAMP                                   | Merck Sigma               | D0627-100MG                     |
| Doxycycline Hyclate                            | Merck Sigma               | D9891                           |
| L-Ascorbic Acid                                | Merck Sigma               | A0278-25G                       |
| Poly-D-lysine hydrobromide >300,000 MW         | Merck Sigma               | P7405                           |
| Poly-L-ornithine hydrobromide 30,000-70,000 MW | Merck Sigma               | P3655                           |
| Puromycin                                      | Merck Sigma               | P8833                           |
| BDNF                                           | PeproTech                 | 450-02                          |
| GDNF                                           | PeproTech                 | 450-10                          |
| Accutase                                       | ThermoFisher              | A1110501                        |
| cultureOne                                     | ThermoFisher              | A3320201                        |
| Geltrex                                        | ThermoFisher              | A14133-01                       |
| Laminin                                        | ThermoFisher              | 23017015                        |
| RevitaCell                                     | ThermoFisher              | A2644501                        |
| TrypLE                                         | ThermoFisher              | 12605010                        |
| Versene                                        | ThermoFisher              | 15040066                        |
| ROCK inhibitor (Y-27632)                       | Tocris                    | 1245/10                         |
| Halo-Protac E                                  | University of Dundee DSTT | HALO-PROTAC-E active            |
| Tetrodotoxin                                   | Tocris                    | 1069                            |
| Gabazine                                       | Tocris                    | 1262                            |



Extended Data Table 2 | DNA Oligonucleotides sequences

| Name                 | Sequence 5'-3'                                 | Use     | Supplier | Catalog Number       |
|----------------------|------------------------------------------------|---------|----------|----------------------|
| UNC13A_For           | CAGACGATCATTGAGGTGCG                           | RT-PCR  | IDT      | NA                   |
| UNC13A_Rev           | ATACTTGGAGGAGAGGCAGG                           | RT-PCR  | IDT      | NA                   |
| STMN2_For            | GCTCTCTCCGCTGCTGTAG                            | RT-PCR  | IDT      | NA                   |
| STMN2_Rev            | CGAGGTTCCGGGTAAGCA                             | RT-PCR  | IDT      | NA                   |
| STMN2_Cryptic_Rev    | CTGTCTCTCTCTCGCACA                             | RT-PCR  | IDT      | NA                   |
| UNC13A_Total_For     | TGATGTTGACCTCGATGAACG                          | RT-qPCR | IDT      | Hs.PT.58.1883136     |
| UNC13A_Total_Rev     | TCTGTCCATGTTGAGCTGTTC                          | RT-qPCR | IDT      | Hs.PT.58.1883136     |
| UNC13A_Total_Probe   | /56-FAM/AGCCACCAC/ZEN/TTTCACTGTGACCTT/3IABkFQ/ | RT-qPCR | IDT      | Hs.PT.58.1883136     |
| UNC13A_Correct_For   | GGACAAGCGAACTGACAAATC                          | RT-qPCR | IDT      | NA                   |
| UNC13A_Correct_Rev   | ACAGGTTCTCATGCAGACAG                           | RT-qPCR | IDT      | NA                   |
| UNC13A_Correct_Probe | /5SUN/ATCAAAGGC/ZEN/GAGGAGAAGGTGGC/3IABkFQ/    | RT-qPCR | IDT      | NA                   |
| Gapdh-Jun            | NA                                             | RT-qPCR | Thermo   | 4485713              |
| CamK2A_For           | TCAATCAGCTGCTCTGTAC                            | RT-qPCR | IDT      | Hs.PT.56a.28027747   |
| CamK2A_Rev           | CCAGTCCAGCGTTCAGTT                             | RT-qPCR | IDT      | Hs.PT.56a.28027747   |
| CamK2B_For           | TCTTGCTGCATACTCATGG                            | RT-qPCR | IDT      | Hs.PT.56a.20211778.g |
| CamK2B_Rev           | CTTACCACGAGTACCAG                              | RT-qPCR | IDT      | Hs.PT.56a.20211778.g |
| GRIA1_For            | CTTAATCGAGTTCTGTACAAATCC                       | RT-qPCR | IDT      | Hs.PT.58.15517507    |
| GRIA1_Rev            | GTATGGCTTCGTTGATGGTTG                          | RT-qPCR | IDT      | Hs.PT.58.15517507    |
| GRIA2_For            | GGTACGACAAAGGAGAGTGC                           | RT-qPCR | IDT      | Hs.PT.58.25075751    |
| GRIA2_Rev            | CCCGACAAGGATGTAGAATACTC                        | RT-qPCR | IDT      | Hs.PT.58.25075751    |
| GRIN1_For            | CTCCTGGAAGATTCAGCTCAA                          | RT-qPCR | IDT      | Hs.PT.58.39141804    |
| GRIN1_Rev            | GTGGATGGCTAACTAGGATGG                          | RT-qPCR | IDT      | Hs.PT.58.39141804    |
| GRIN2A_For           | CAAGAAGTAATGGCACCGTCT                          | RT-qPCR | IDT      | Hs.PT.58.26949410    |
| GRIN2A_Rev           | GCAGAAACAATGAGCAGCATC                          | RT-qPCR | IDT      | Hs.PT.58.26949410    |
| GRIN2B_For           | CTTCATAGAGACAGGCATCAGT                         | RT-qPCR | IDT      | Hs.PT.58.40419546    |
| GRIN2B_Rev           | CATCACAAACATCATACCCATAC                        | RT-qPCR | IDT      | Hs.PT.58.40419546    |
| mGluR5_For           | TGTGAGAAAGGCCAGATCAAG                          | RT-qPCR | IDT      | Hs.PT.58.40025787    |
| mGluR5_Rev           | TGCCTTGCATGTGTACTCATC                          | RT-qPCR | IDT      | Hs.PT.58.40025787    |
| STMN2_For            | CCACGAACCTTAGCTTCTCCA                          | RT-qPCR | IDT      | Hs.PT.58.5075784     |
| STMN2_Rev            | GCCAATTGTTTCAGCACCTG                           | RT-qPCR | IDT      | Hs.PT.58.5075784     |

**Extended Data Table 3 | Antibodies**

| <b>Antibody</b>                               | <b>Supplier; Catalog Number</b> | <b>Use</b> | <b>Dilution</b> |
|-----------------------------------------------|---------------------------------|------------|-----------------|
| Rabbit anti UNC13A                            | Synaptic Systems; 126 103       | WB         | 1:2,000         |
| Rabbit anti TDP-43                            | ProteinTech; 10782-2-AP         | WB         | 1:2,000         |
| Mouse anti Tubulin                            | ProteinTech; 66031-1-Ig         | WB         | 1:2,000         |
| Rabbit anti STMN2                             | ProteinTech; 10586-1-AP         | WB         | 1:2,000         |
| Goat anti Mouse IGG-HRP conjugate             | BioRad; 1706516                 | WB         | 1:10,000        |
| Goat anti Rabbit IGG-HRP conjugate            | BioRad; 1706515                 | WB         | 1:10,000        |
| Mouse anti TDP-43                             | Abcam; ab104223                 | IF         | 1:1,000         |
| Mouse anti Synapsin                           | Synaptic Systems; 106 011       | IF         | 1:1,000         |
| Guinea Pig anti UNC13A                        | Synaptic Systems; 126 104       | IF         | 1:500           |
| Chicken anti MAP2                             | Abcam; ab5392                   | IF         | 1:10,000        |
| Goat anti Mouse IgG (H+L) AlexaFluor 488      | ThermoFisher; A-11029           | IF         | 1:1,000         |
| Goat anti Guinea Pig IgG (H+L) AlexaFluor 647 | ThermoFisher; A-21450           | IF         | 1:1,000         |
| Goat anti Chicken IgY (H+L) AlexaFluor 647    | ThermoFisher; A-21449           | IF         | 1:1,000         |

**Extended Data Table 4 | Software**

| <b>Software</b>                      | <b>Source</b>                                                                                                   |
|--------------------------------------|-----------------------------------------------------------------------------------------------------------------|
| Fiji/ImageJ v2.14                    | <a href="https://imagej.net/software/fiji/">https://imagej.net/software/fiji/</a>                               |
| Prism v10                            | GraphPad                                                                                                        |
| R v4.2.2                             | <a href="https://www.r-project.org/">https://www.r-project.org/</a>                                             |
| Clampex v10.6                        | Molecular Devices                                                                                               |
| Axon Multiclamp Commander v10.4      | Molecular Devices                                                                                               |
| Clampfit 10.7                        | Molecular Devices                                                                                               |
| MATLAB R2021a                        | Mathworks                                                                                                       |
| ImageLab Touch Software v1.0.0.15    | Bio-Rad                                                                                                         |
| IGV browser v2.8.2                   | UC San Diego and Broad Institute of MIT and Harvard                                                             |
| Minimap2 v2.26-r1175                 | <a href="https://github.com/lh3/minimap2">https://github.com/lh3/minimap2</a>                                   |
| QIAxcelR                             | <a href="https://github.com/Delayed-Gitification/QIAxcelR">https://github.com/Delayed-Gitification/QIAxcelR</a> |
| TapeStation Systems Software v3.2    | Agilent                                                                                                         |
| QuantStudio Design & Analysis v1.5.2 | ThermoFisher Scientific                                                                                         |
| Maestro Pro – AxIS Navigator v3.7.2  | Axion Biosystems                                                                                                |
| Neural Metric Tool v4.0.5            | Axion Biosystems                                                                                                |
| Zen Blue v3.3                        | Carl Zeiss AG                                                                                                   |
